# Supplementary material for: Impact of Endoscopic Surgical Skill Qualification on Laparoscopic Resections for Rectal Cancer in Japan: The EnSSURE Study
Source: PubMed Central journal article supplement — Ann Surg Open. 2022 Apr 22;3(2):e160. doi: 10.1097/AS9.0000000000000160 (PMC10431478; doi:10.1097/as9.0000000000000160), 2022-04-22
Supplement: as9-3-e160-s002.pdf [file as9-3-e160-s002.pdf]

Table S1. Types of surgical contribution of ESSQS-certified surgeons

|                                        | N (%)      |
|----------------------------------------|------------|
| Total                                  | 2644       |
| Role                                   |            |
| Operator                               | 1843 (58%) |
| Partial operator                       | 224 (7%)   |
| Assistant operator                     | 1357 (43%) |
| Scope operator                         | 159 (5%)   |
| Adviser                                | 33 (1%)    |
| Number of attending certified surgeons |            |
| 1                                      | 1747 (66%) |
| 2                                      | 823 (31%)  |
| 3                                      | 73 (3%)    |
| 4                                      | 1 (0.03%)  |

Abbreviation: ESSQS, intervention by surgeons qualified by the Endoscopic Surgical Skill Qualification System
