# Supplementary material for: Impact of Endoscopic Surgical Skill Qualification on Laparoscopic Resections for Rectal Cancer in Japan: The EnSSURE Study
Source: PubMed Central journal article supplement — Ann Surg Open. 2022 Apr 22;3(2):e160. doi: 10.1097/AS9.0000000000000160 (PMC10431478; doi:10.1097/as9.0000000000000160), 2022-04-22
Supplement: as9-3-e160-s003.pdf [file as9-3-e160-s003.pdf]

Table S2. Operative outcomes (crude)

|                                               | <b>With ESSQS</b><br><b>(n=2644)</b> | <b>Without ESSQS</b><br><b>(n=544)</b> | <b>P-value</b> |
|-----------------------------------------------|--------------------------------------|----------------------------------------|----------------|
| <b>Operative time (min)</b>                   | 301 (126)                            | 304 (118)                              | 0.63           |
| <b>Blood loss (mL)</b>                        | 99 (265)                             | 100 (224)                              | 0.94           |
| <b>Conversion</b>                             | 28 (1.1%)                            | 37 (6.8%)                              | <0.001         |
| <b>Intraoperative complication</b>            | 46 (1.7%)                            | 12 (2.2%)                              | 0.46           |
| <b>Postoperative complication (G3)</b>        | 332 (12.5%)                          | 77 (14.1%)                             | 0.31           |
| <b>Intraperitoneal bleeding (G3)</b>          | 11 (0.4%)                            | 2 (0.4%)                               | 0.87           |
| <b>Anastomotic bleeding (G3)</b>              | 16 (0.6%)                            | 6 (1.1%)                               | 0.23           |
| <b>Anastomotic leakage (G3)</b>               | 159 (6.0%)                           | 34 (6.2%)                              | 0.82           |
| <b>Intraperitoneal abscess (G3)</b>           | 51 (1.9%)                            | 12 (2.2%)                              | 0.67           |
| <b>Wound infection (G3)</b>                   | 30 (1.1%)                            | 9 (1.7%)                               | 0.33           |
| <b>Ileus (G3)</b>                             | 51 (1.9%)                            | 13 (2.4%)                              | 0.48           |
| <b>Other postoperative complications (G3)</b> | 42 (1.6%)                            | 10 (1.8%)                              | 0.68           |
| <b>Reoperation</b>                            | 125 (4.7%)                           | 29 (5.3%)                              | 0.52           |
| <b>Postoperative hospital stay (days)</b>     | 17.2 (14.8)                          | 17.9 (15.6)                            | 0.33           |
| <b>Number of harvested lymph nodes</b>        | 22.2 (12.2)                          | 18.1 (10.9)                            | <0.001         |
| <b>Pathological R0 resection</b>              | 2583 (99%)                           | 528 (98%)                              | 0.11           |

Abbreviations: ESSQS, intervention by surgeons qualified by the Endoscopic Surgical Skill Qualification System; CI, confidence interval; G3, grade 3 according to the Clavien-Dindo classification system; SD, standard deviation. Continuous data are described as mean (standard deviation)
