# Supplementary figures and images for: Impact of Endoscopic Surgical Skill Qualification on Laparoscopic Resections for Rectal Cancer in Japan: The EnSSURE Study
Source: PubMed Central journal article supplement — Ann Surg Open. 2022 Apr 22;3(2):e160. doi: 10.1097/AS9.0000000000000160 (PMC10431478; doi:10.1097/as9.0000000000000160), 2022-04-22

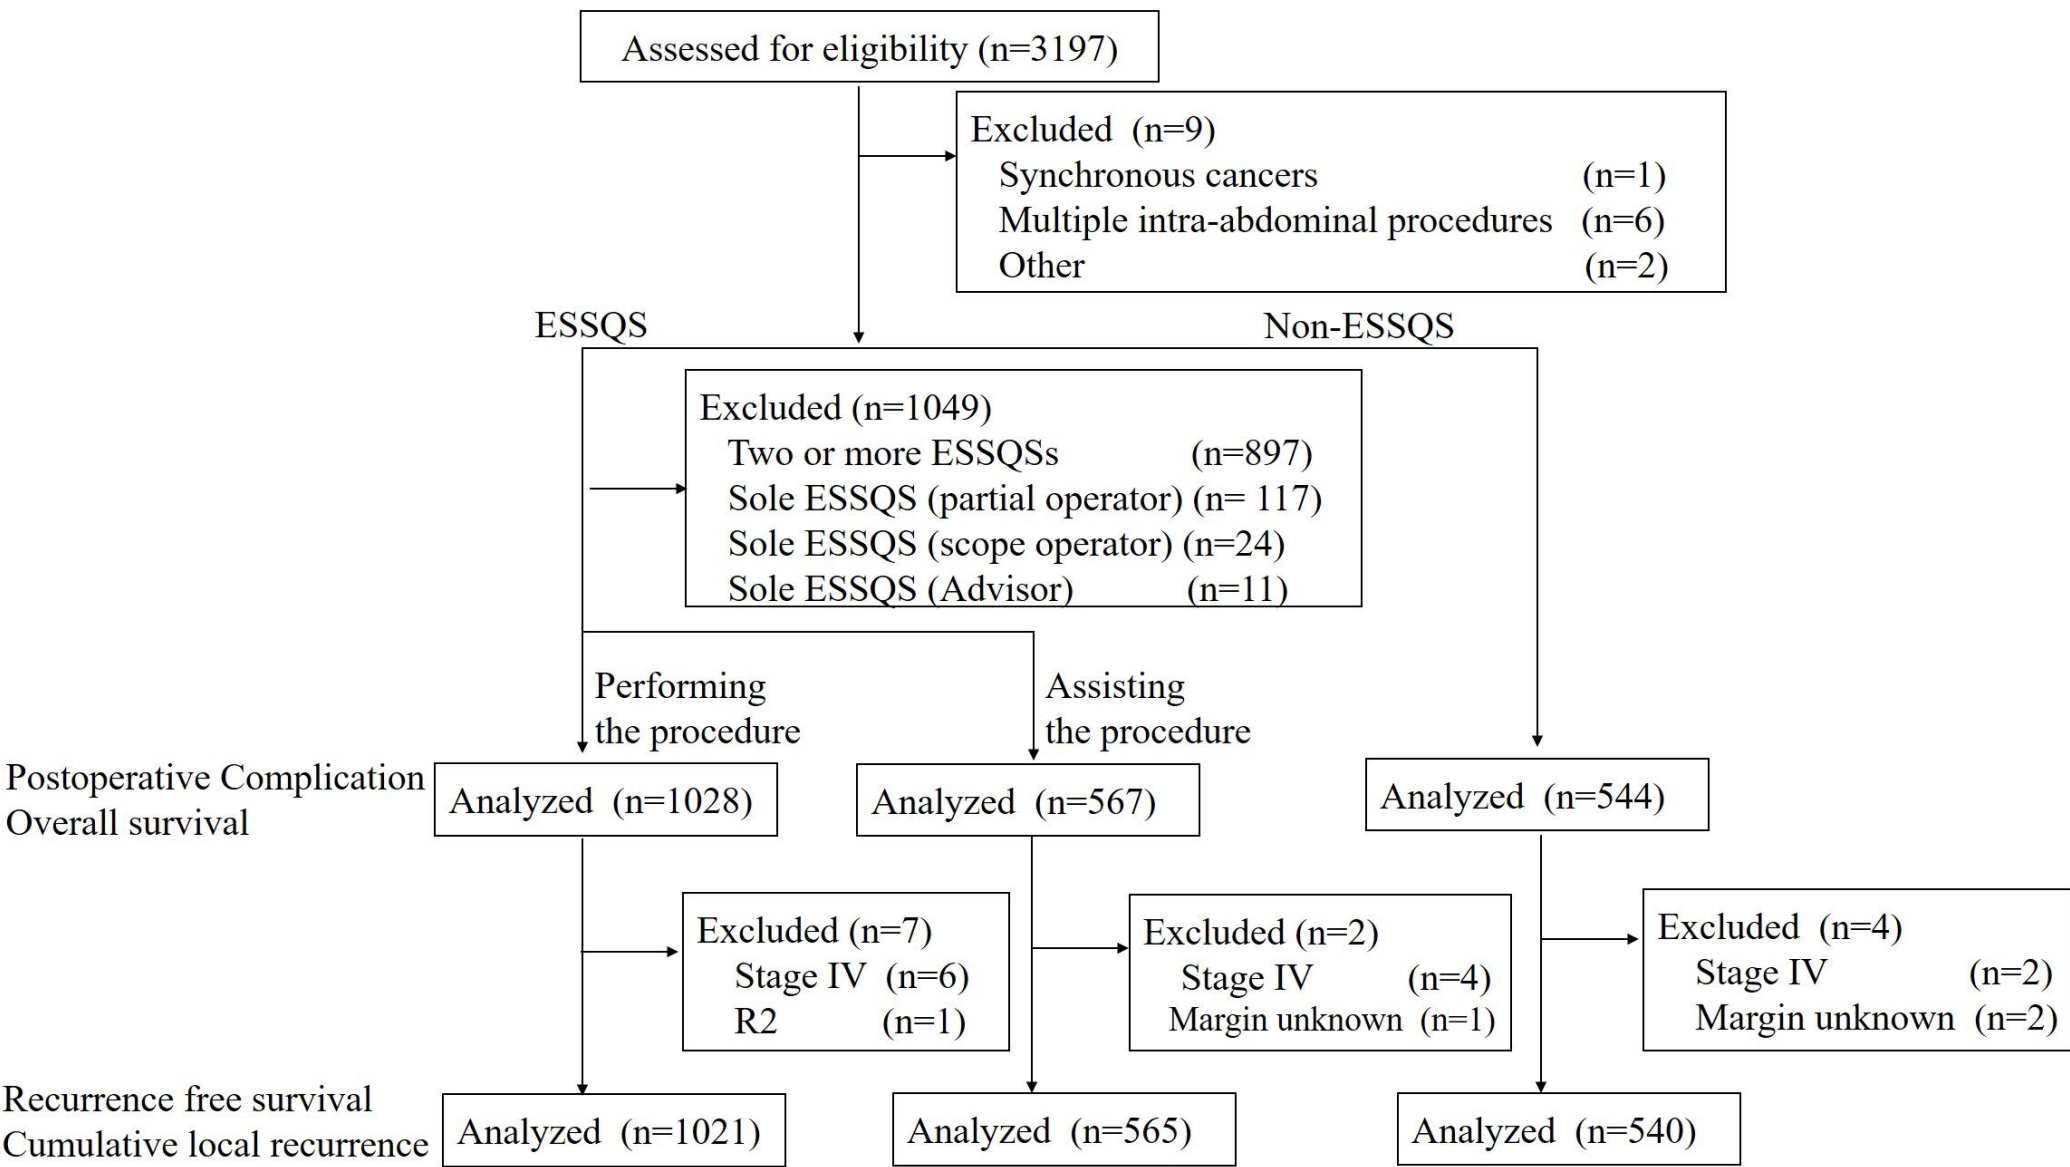

Supplement: as9-3-e160-s001.pdf [file as9-3-e160-s001.pdf]
